# Supplementary material
Source: Springer Nature journal article supplement (https://www.springermedizin.de/resource/supplementary/12885_2014_5198_MOESM3_ESM.pdf/9468570)
Supplement: MOESM3 [file 9468570]

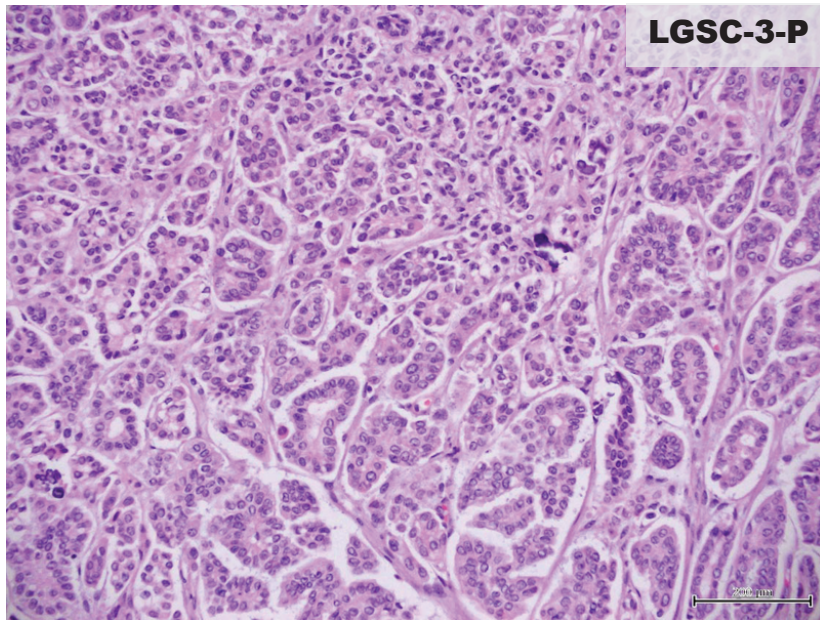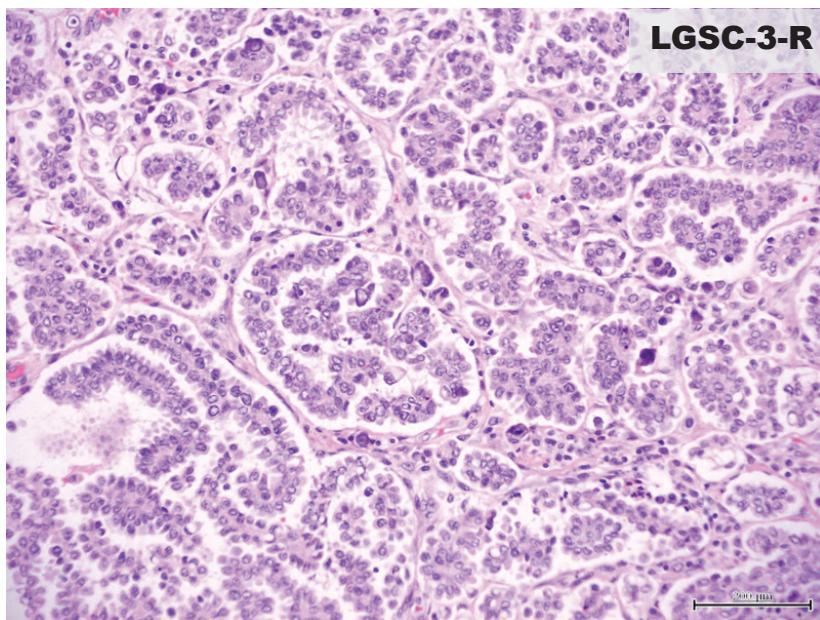

**Additional File 5. LGSC-3 Case Images.**
